# Supplementary material for: Exploring Science Identity and Latent Factors of Student Gains in a Place-based Marine Science CURE Designed to Provide Access to Hawaiʻi Students from Historically Marginalized Ethnicities
Source: Atypon-hosted journal article supplement (doi:10.1187/cbe.24-02-0038), 2024-10-07

# Supplemental Material

*CBE—Life Sciences Education*

Ambrosino *et al.*

**Table S1.** KMO measure of sampling adequacy for each item in the pre and post-intervention datasets

| Abbreviated Item        | Pre-Intervention | Post-Intervention |
|-------------------------|------------------|-------------------|
| Career                  | 0.77             | 0.91              |
| Confident research      | 0.89             | 0.89              |
| Confident understanding | 0.86             | 0.93              |
| Discussing              | 0.80             | 0.83              |
| Enthusiastic            | 0.83             | 0.84              |
| Research with others    | 0.77             | 0.87              |
| Applying knowledge      | 0.78             | 0.88              |
| Connecting knowledge    | 0.79             | 0.87              |
| Develop H0              | 0.87             | 0.92              |
| Test H0                 | 0.86             | 0.88              |
| Evaluate H0             | 0.88             | 0.90              |
| Effective with others   | 0.68             | 0.85              |
| Ecology                 | 0.77             | 0.94              |
| Fertilization           | 0.69             | 0.93              |
| Relate to life          | 0.75             | 0.94              |
| Scientific process      | 0.78             | 0.94              |

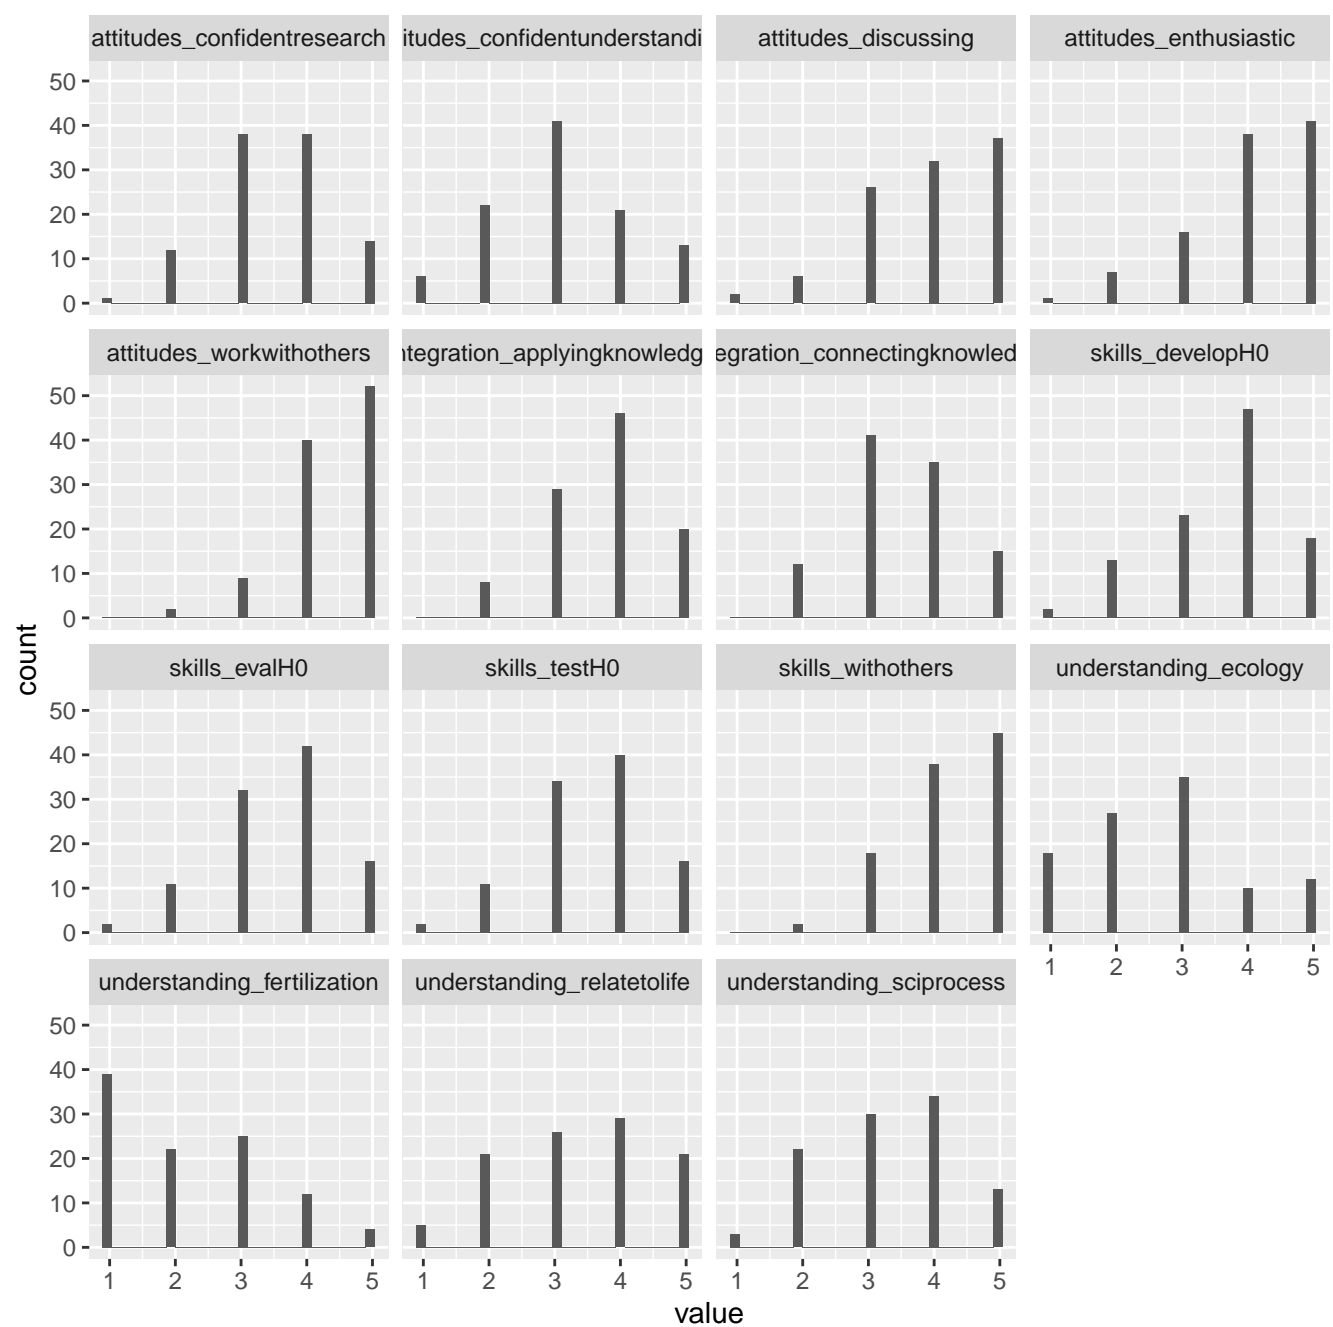

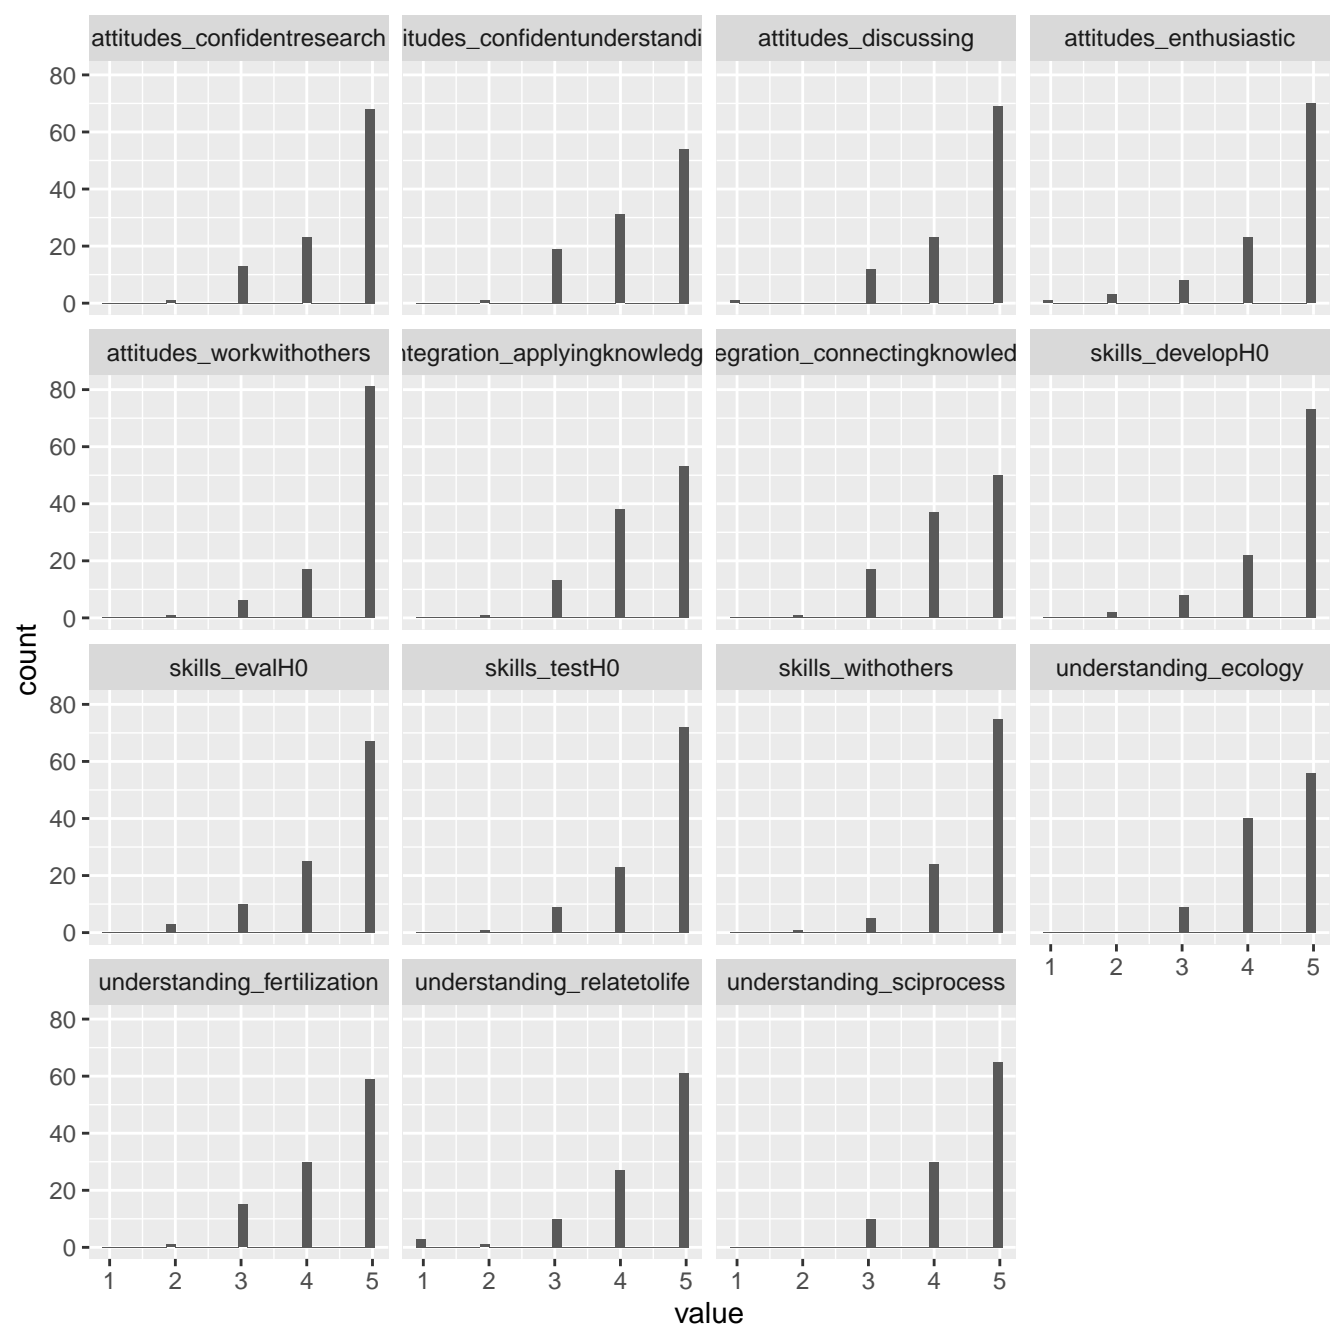

Supplement: combinedsupmats.pdf [file combinedsupmats.pdf]
